# Supplementary material
Source: PubMed Central journal article supplement (PMC1458766)

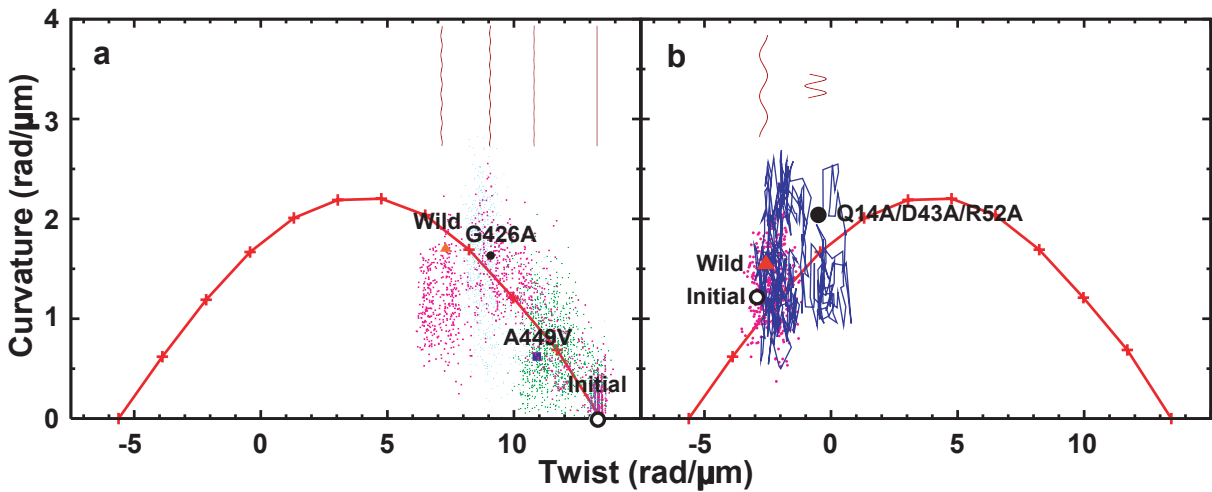

Supplement: pnas_0510285103_1.pdf [file pnas_0510285103_1.pdf]

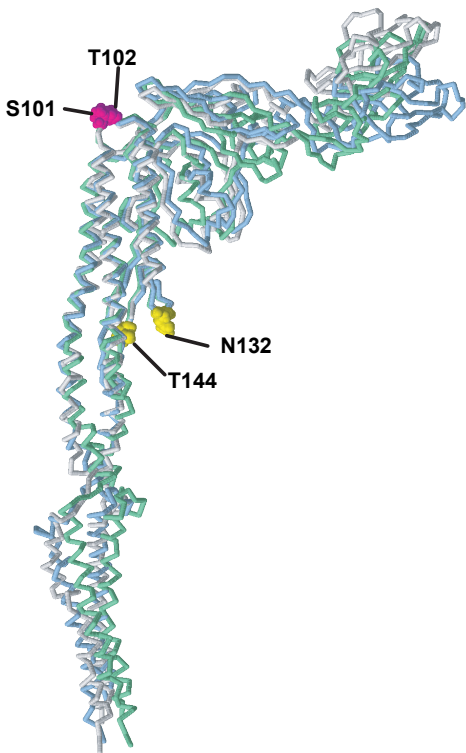

Supplement: pnas_0510285103_2.pdf [file pnas_0510285103_2.pdf]

a

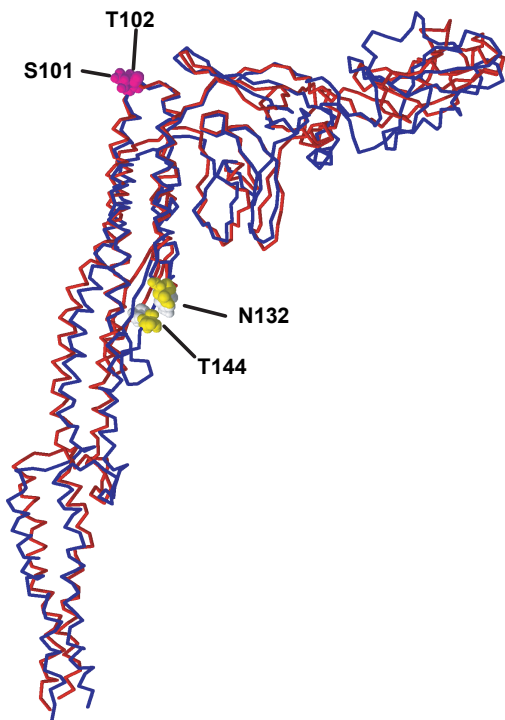

b

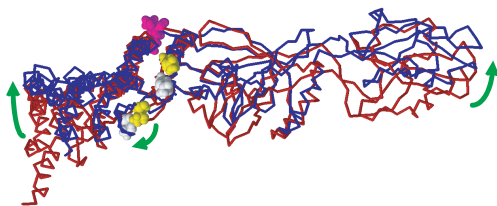

Supplement: pnas_0510285103_3.pdf [file pnas_0510285103_3.pdf]
